# Supplementary material for: Quantitative assessment of in vivo distribution of nanoplastics in bivalve Ruditapes philippinarum using reliable SERS tag-labeled nanoplastic models
Source: Royal Society of Chemistry journal article supplement (doi:10.1039/d2nr00157h), 2022-01-01
Supplement: d2nr00157h1.pdf [file d2nr00157h1.pdf]

## Supporting information

# Quantitative assessment of in vivo distribution of nanoplastics in bivalve *Ruditapes philippinarum* via reliable SERS tag-labeled nanoplastic models

Hongyu Du<sup>a,b</sup>, Yunqing Wang<sup>a,c,d\*</sup>, Panpan Zhang<sup>a,b</sup>, Rongchao Mei<sup>a</sup>, Yunxia Ji<sup>a</sup>, Xizhen Zhao<sup>a</sup>, Zhiyang Zhang<sup>a,c</sup>, Jiping Ma<sup>e</sup>, Lingxin Chen<sup>a,c,d,f\*</sup>

<sup>a</sup> CAS Key Laboratory of Coastal Environmental Processes and Ecological Remediation, Yantai Institute of Coastal Zone Research, Chinese Academy of Sciences, Yantai 264003, China

<sup>b</sup> University of Chinese Academy of Sciences, Beijing 100049, China

<sup>c</sup> Center for Ocean Mega-Science, Chinese Academy of Sciences, Qingdao 266071, China

<sup>d</sup> School of Pharmacy, Binzhou Medical University, Yantai 264003, China

<sup>e</sup> School of Environmental & Municipal Engineering, Qingdao University of Technology, Qingdao 266033, China

<sup>f</sup> Laboratory for Marine Biology and Biotechnology, Pilot National Laboratory for Marine Science and Technology, Qingdao 266237, China

\*Corresponding authors.

yqwang@yic.ac.cn (Y. Wang);

lxchen@yic.ac.cn (L. Chen).

### 1. Synthesis of gold nanostar (AuNS).

Au nanostar were synthesized via a seed growth method. Briefly, Au seeds (12 nm) solution was first prepared. Under stirring and refluxing conditions, 15 mL of sodium citrate (1 wt %) was added to 100 mL of boiling HAuCl<sub>4</sub> (1 mM) solution. The mixture solution will continue boiling for 15

minutes, and then be cooled and filtered by a 0.22  $\mu\text{m}$  nitrocellulose membrane. For Au nanostar synthesis, under stirring and room temperature, 100  $\mu\text{L}$  of the Au seed solution was added to 10 mL of  $\text{HAuCl}_4$  (0.25 mM) solution. Then 100  $\mu\text{L}$   $\text{AgNO}_3$  (2 mM) and 50  $\mu\text{L}$  AA (0.1 M) were added simultaneously. The mixture solution was stirred for 30 s after 100  $\mu\text{L}$  of CTAB (0.1 M) was added. The color of the solution turned from light red to blue.

## 2. Synthesis of bare SERS tags.

A 200  $\mu\text{L}$  of Cy7 solution was added to a 20 mL of Au nanostar solution and kept for 0.5 h. The final concentration of Cy7 was  $10^{-6}$  M.

## 3. SERS@PS NP concentration calculation.

**Mass concentration.** 150  $\mu\text{L}$  of SERS@PS NP solution was added into a 200  $\mu\text{L}$  centrifugal tube and dried in a vacuum drying oven at 40  $^\circ\text{C}$  for 24 h. Then, the mass of SERS@PS samples was weighed. The concentration of SERS@PS NP solution was calculated as 500 mg/L. The concentration of SERS@PS NP solution in exposure experiment was 0.2 mg/L (Take 4 ml of the original SERS@PS NP solution and add it to 10 L sea water, diluted 2500 times).

**Particle number concentration.** The particle number concentration of SERS@PS can be estimated from the concentration Au nanostar and thus the Au seed NPs by the following formula.

$$C_{Au\ seed} = C_{Au\ element} \times M_{Au\ element} / \rho_{Au} \times V_{single\ Au\ seed}$$

$C_{Au\ seed}$ : quantity concentration of Au seeds;  $C_{Au\ element}$ : molar concentration of  $\text{HAuCl}_4$  used in the synthesis of Au seeds (assuming the reaction is complete);  $\rho_{Au}$ : 19.32  $\text{g}/\text{cm}^3$ ;  $V_{single\ Au\ seed}$ : volume of single Au seed ( $4\pi R^3/3$ ); R: radius of single Au seed, 6 nm.

$$C_{Au\ element} = \frac{n_{Au\ element}}{V_{Au\ seed\ solution}} = \frac{0.1\ \text{L} \times 0.001\ \text{M}}{0.115\ \text{L}} = 8.70 \times 10^{-4}\ \text{M}$$

$$M_{Au\ element} = 196.97\ \text{g}/\text{mol}$$

$$V_{single\ Au\ core} = \frac{4\pi R^3}{3} = \frac{4 \times \pi \times 6^3}{3} = 9.04 \times 10^{-25}\ \text{m}^3$$

$$\therefore C_{Au\ seed} = \frac{C_{Au\ element} \times M_{Au\ element}}{\rho_{Au} \times V_{single\ Au\ seed}} = \frac{8.70 \times 10^{-4}\ \text{M} \times 196.97\ \frac{\text{g}}{\text{mol}}}{19.32 \times 10^6\ \frac{\text{g}}{\text{m}^3} \times 9.04 \times 10^{-25}\ \text{m}^3} = 9.8 \times 10^{15}\ \text{particles}/\text{L}$$

The concentration of Au seed was calculated to be  $9.8 \times 10^{15}$  particles/L, so the concentration of Au nanostar was  $9.8 \times 10^{13}$  particles/L (Au seeds were diluted 100 times), and the concentration of SERS@PS NP was  $1.5 \times 10^{15}$  particles/L (Au nanostar was concentrated 15 times).

## 4. Au element concentration in SERS@PS NP solution

In order to verify the accuracy of the digestion method, 1.0 mL of HNO<sub>3</sub> (AR) was added to 1 mL 0.5 mg/L SERS@PS NP solution and heated for 12 h at 90 °C. Clear solutions could be obtained and the volumes of which were fixed to 10.0 mL for ICP-MS analysis of Au. The main operating condition was as follows: the auxiliary flow was 0.025 L/min, and the plasma gas flow was 0.5 L/min. The quantification was performed using a eight-point calibration curve between 1 and 500 ng/mL, and <sup>115</sup>In was chosen as an internal standard element.

Theoretical concentration of Au of 1 mL SERS@PS NP solution:

$$C_{Au} = \frac{m_{Au}}{V} = \frac{c_{HAuCl_4} \times V_{AuNS} \times M_{Au\ element}}{V}$$

$C_{Au}$ : theoretical concentration of Au of 1 mL 0.5 mg/L SERS@PS NP solution;  $V_{AuNS}$ : volume of AuNS solution used in the synthesis of 1 mL 0.5 mg/L SERS@PS NP solution (assuming the reaction is complete);  $M_{Au\ element}$ : 196.97 g/mol;  $V$ : volume of SERS@PS NP solution for ICP-MS, 10 mL.

$$c_{HAuCl_4} = \frac{\frac{100\ \mu L}{115\ mL} \times 0.1\ L \times 1\ mM + 0.01\ L \times 0.25\ mM}{10\ mL} = 0.26\ mM$$

$$C_{Au} = \frac{m_{Au}}{V} = \frac{c_{HAuCl_4} \times V_{HAuCl_4} \times M_{Au\ element}}{V} = \frac{0.26\ mM \times 15\ \mu L \times 196.97}{10\ mL}$$

The recovery of NPs from the main organs of the bivalves was tested via a standard addition experiment. 3.0 g of the tissues of a blank clam was weighed and added to 1 mL 0.5 mg/L SERS@PS, then, they were soaked in 1.0 mL of HNO<sub>3</sub> (AR) for 1 h, and then heated in an oil bath at 100 °C for 10 h to digest. 1 mL 0.5 mg/L SERS@PS sample solution was digested with the same method. Clear solutions could be obtained and the volumes of which were fixed to 10.0 mL for ICP-MS analysis of Au. The main operating condition was as follows: the auxiliary flow was 0.025 L/min, and the plasma gas flow was 0.5 L/min. The quantification was performed using an eight-point calibration curve between 1 and 500 ng/mL, and <sup>115</sup>In was chosen as an internal standard element. Each sample was measured 3 times as a parallel, and the Au content was obtained from the average value and standard deviation of 3 parallel measurements.

Table S1 Au account and recovery of SERS@PS (n=3)

|                             | SERS@PS      | SERS@PS and tissues |
|-----------------------------|--------------|---------------------|
| Concentration of Au (ng/mL) | 41.95 ± 3.70 | 36.14 ± 3.55        |
| Recovery (%)                |              | 86.2                |

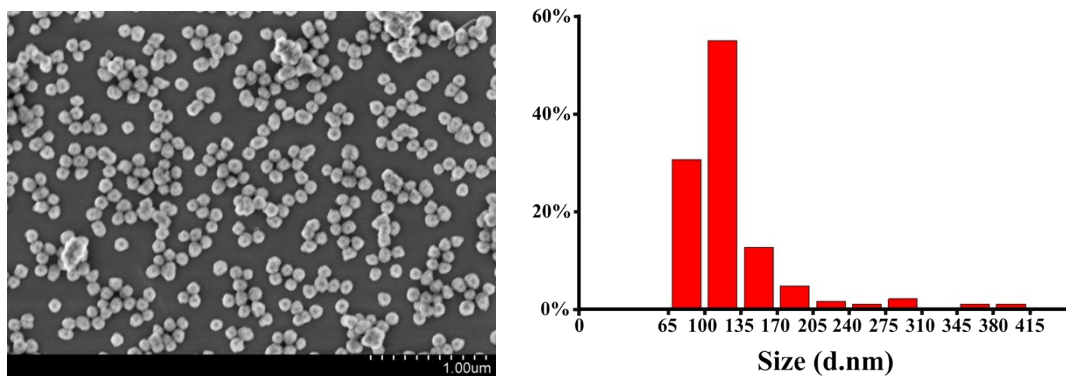

Figure S1. SEM image of SERS@PS NPs and the size distribution by counting 200 NPs.

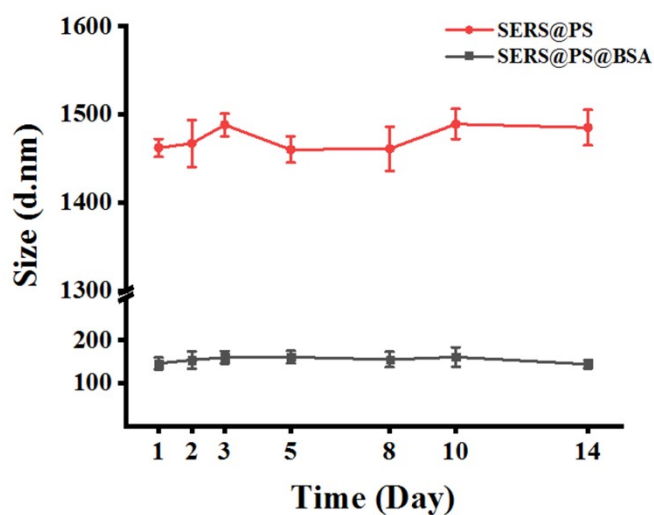

Figure S2. The size distribution of SERS@PS and SERS@PS@BSA NPs in seawater over 14 days.

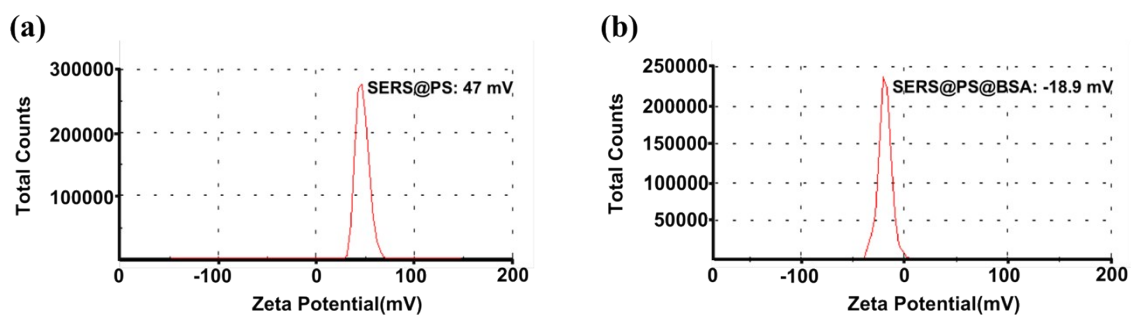

Figure S3. Zeta potential of (a) SERS@PS and (b) SERS@PS@BSA.

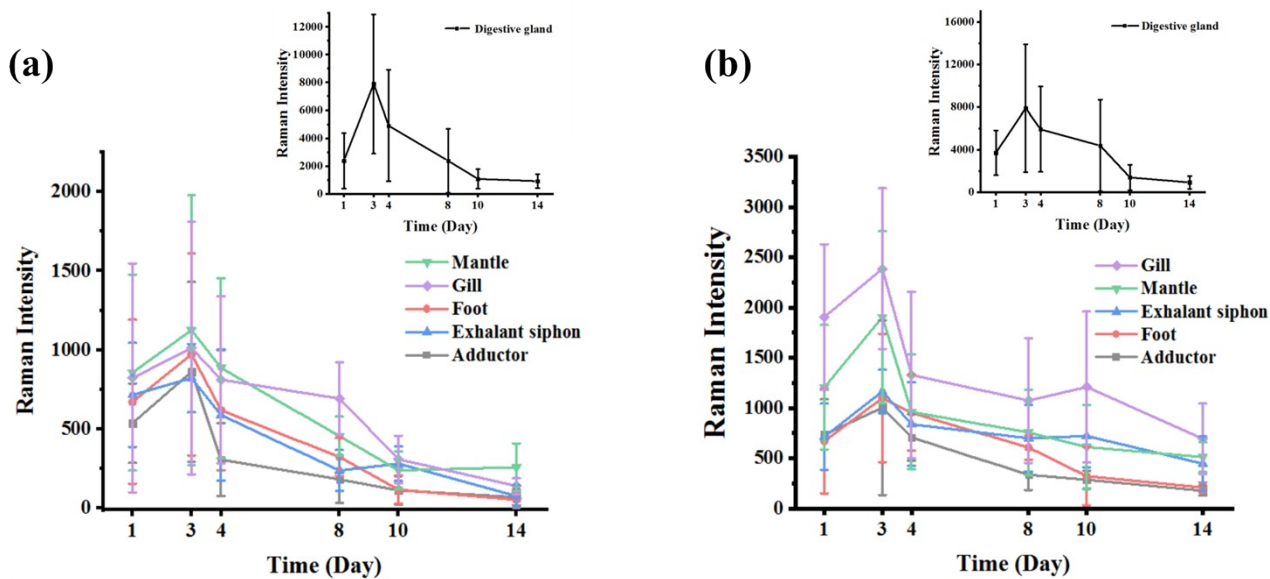

Figure S4. SERS intensities of six organs after exposure to (a) SERS@PS and (b) SERS@PS@BSA (from 1 to 3 day) and depuration (from 4 to 14 day). Each value is the mean of intensities of 15 values (from three bivalves and 5 repeated detections for each bivalve).

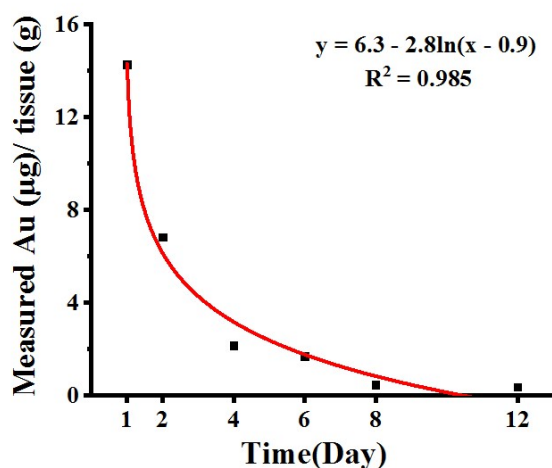

Figure S5. The elimination curve of SERS@PS NPs in digestive gland.
